# Supplementary material for: Retinal inputs signal astrocytes to recruit interneurons into visual thalamus
Source: PubMed Central journal article supplement — Proc Natl Acad Sci U S A. 2020 Jan 21;117(5):2671–82. doi: 10.1073/pnas.1913053117 (PMC7007527; doi:10.1073/pnas.1913053117), 2020-01-21
Supplement: pnas.1913053117.sapp.pdf [file pnas.1913053117.sapp.pdf]

Supplementary Information for

## **Retinal Inputs Signal Astrocytes to Recruit Interneurons into Visual Thalamus**

Jianmin Su<sup>\*</sup>, Naomi E. Charalambakis<sup>\*</sup>, Ubadah Sabbagh, Rachana D. Somaiya, Aboozar Monavarfeshani, William Guido<sup>#</sup>, Michael A. Fox<sup>#</sup>.

**Michael A. Fox**

Email: [mafox1@vtc.vt.edu](mailto:mafox1@vtc.vt.edu)

**William Guido**

Email: [william.guido@louisville.edu](mailto:william.guido@louisville.edu)

**This PDF file includes:**

Figures S1 to S6

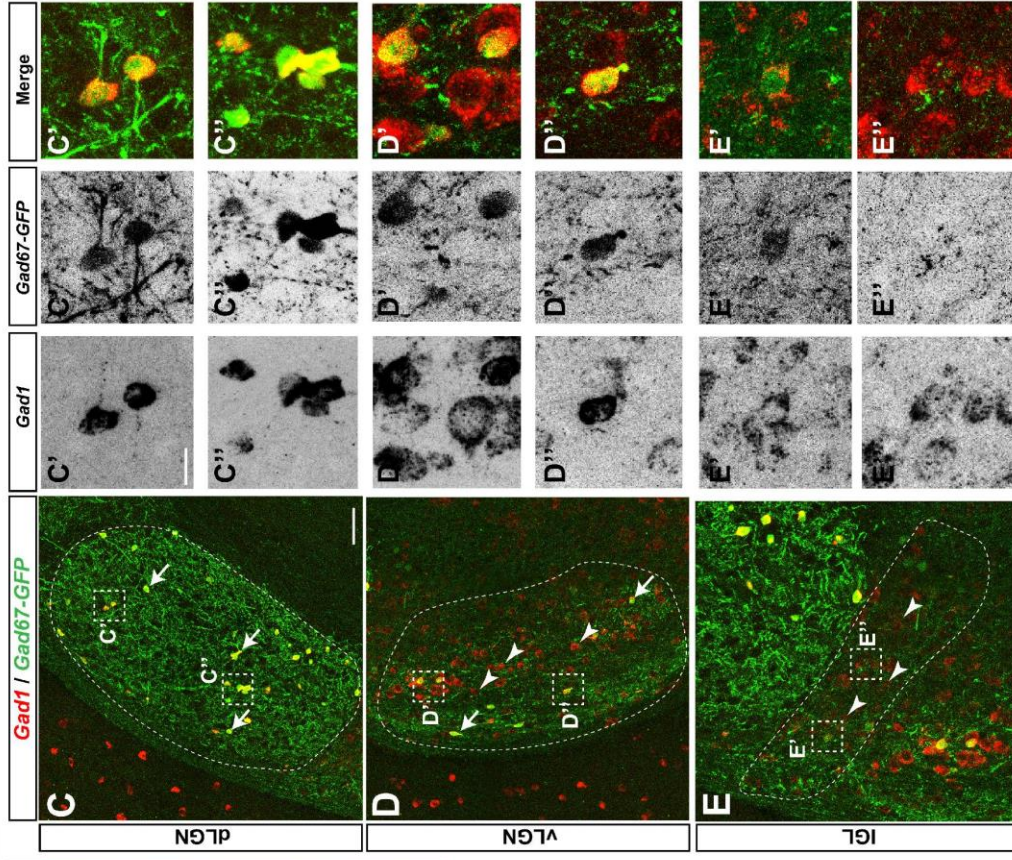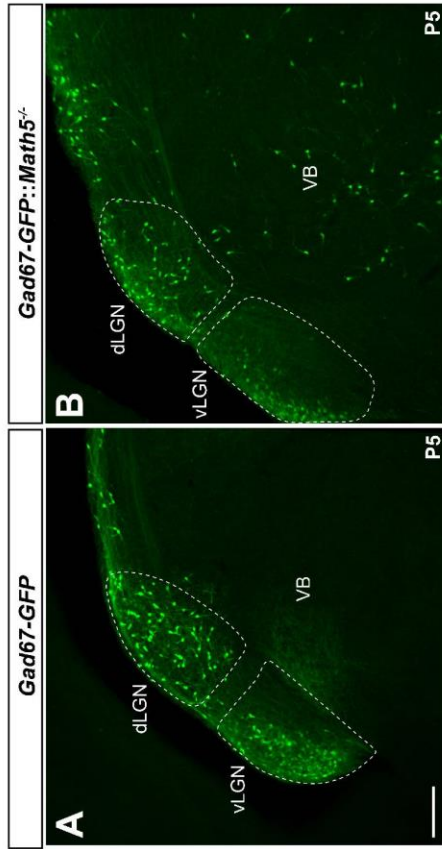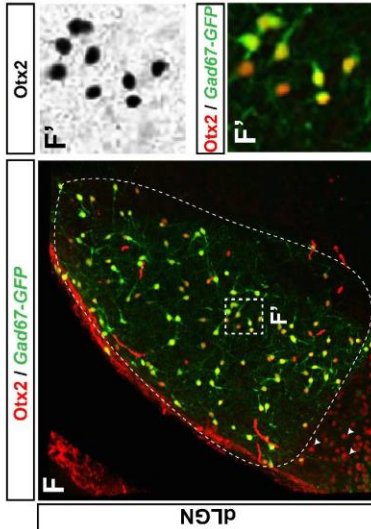

**Fig. S1. *Gad67-GFP* labels a subset of GABAergic neurons in visual thalamus.**

(A) A subset of GABAergic interneurons in the visual thalamus labeled in *Gad67-GFP* mice. (B) A subset of GABAergic interneurons in the visual thalamus labeled in *Gad67-GFP::Math5<sup>-/-</sup>*. (C-E) Localization of *Gad1* mRNA (*in situ* hybridization) in dLGN (C), vLGN (D), and IGL (E) of interneurons in P22 *Gad67-GFP* mice. White arrowheads indicate *Gad1*<sup>+</sup>GFP<sup>-</sup> neurons; white arrows indicate *Gad1*<sup>+</sup>GFP<sup>+</sup> neurons. dLGN, vLGN, and IGL are outlined with dashed lines in C, D, and E, respectively. (F) Immunostaining for Otx2 revealing co-expression in GFP<sup>+</sup> GABAergic interneurons in dLGN (outlined in white) of *Gad67-GFP* mice. White arrowheads indicate Otx2<sup>+</sup>GFP<sup>-</sup> neurons inside IGL. Scale bars: 150 μm A,B; 70 μm for C-F; 20 μm for C',D',E',F'.

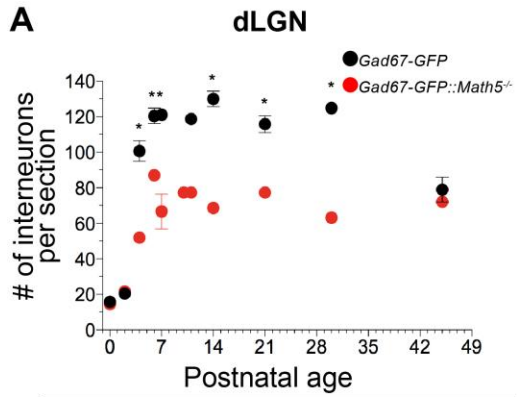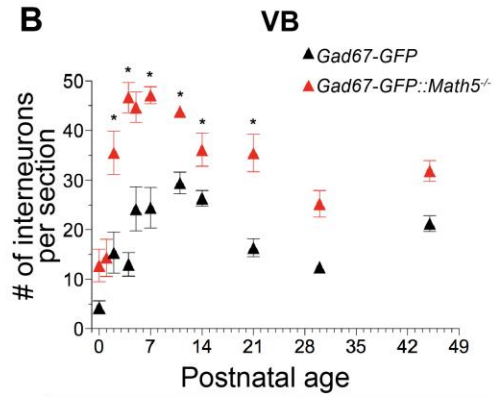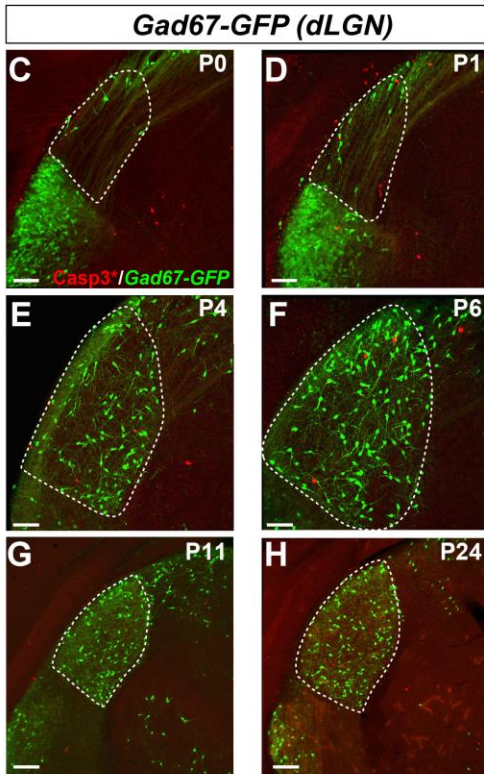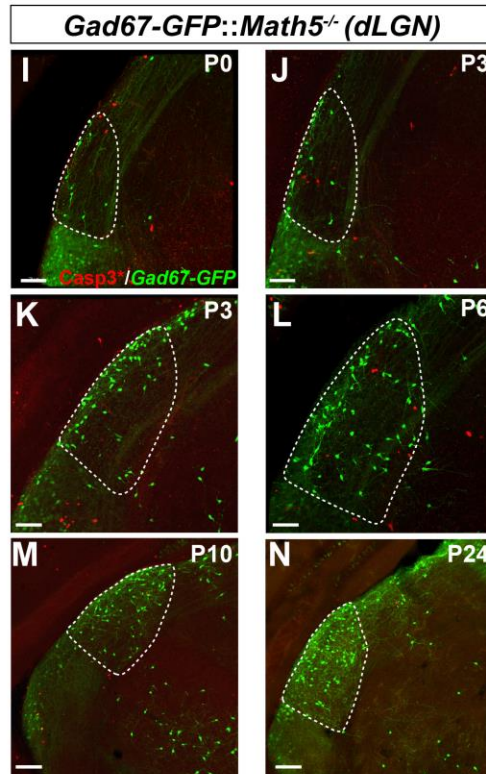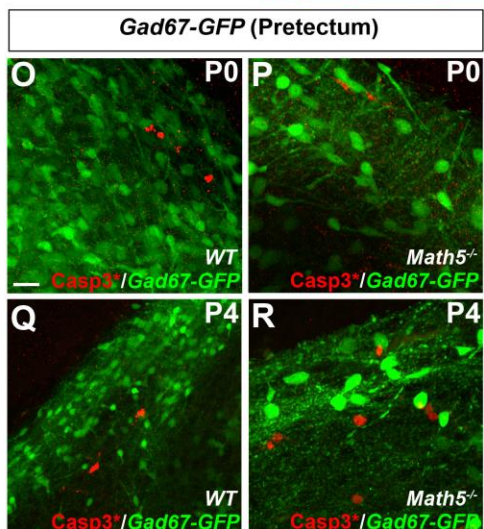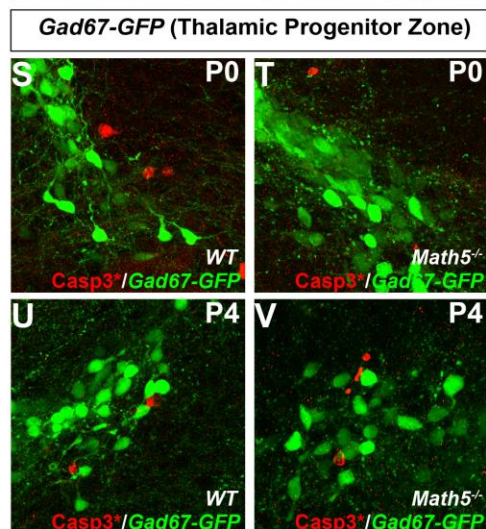

**Fig. S2. Loss of GFP<sup>+</sup> interneurons in *Gad67-GFP::Math5<sup>-/-</sup>* mice is due to misrouting, not programmed cell death.**

(A-B) Number of GFP<sup>+</sup> interneurons throughout the developing dLGN (A) and VB (B) of *Gad67-GFP* and *Gad67-GFP::Math5<sup>-/-</sup>* mice. Data points indicate mean  $\pm$  SEM. Asterisks (\*) represent significance ( $p < 0.001$ ) between control and mutant (Two-Way ANOVA). (C-N) Immunostaining for cleaved Caspase 3 (Casp3<sup>\*</sup>) in dLGN of P0-P24 *Gad67-GFP* mice. Note the sparse Casp3<sup>\*</sup> immunoreactivity in visual thalamus of both *Gad67-GFP* and *Gad67-GFP::Math5<sup>-/-</sup>* mice. (O-R) Immunostaining for cleaved Caspase 3 (Casp3<sup>\*</sup>) in the pretectal migratory path of neonatal *Gad67-GFP* and *Gad67-GFP::Math5<sup>-/-</sup>* mice indicating no apoptosis of GFP<sup>+</sup> cells along that route. (S-V) Immunostaining for cleaved Caspase 3 (Casp3<sup>\*</sup>) in the thalamic migratory path of neonatal *Gad67-GFP* and *Gad67-GFP::Math5<sup>-/-</sup>* mice indicating no apoptosis of GFP<sup>+</sup> cells along that route. Scale bars = 70  $\mu$ m for C-F, I-L; 150  $\mu$ m for G, H, M, N; 20  $\mu$ m for O-V.

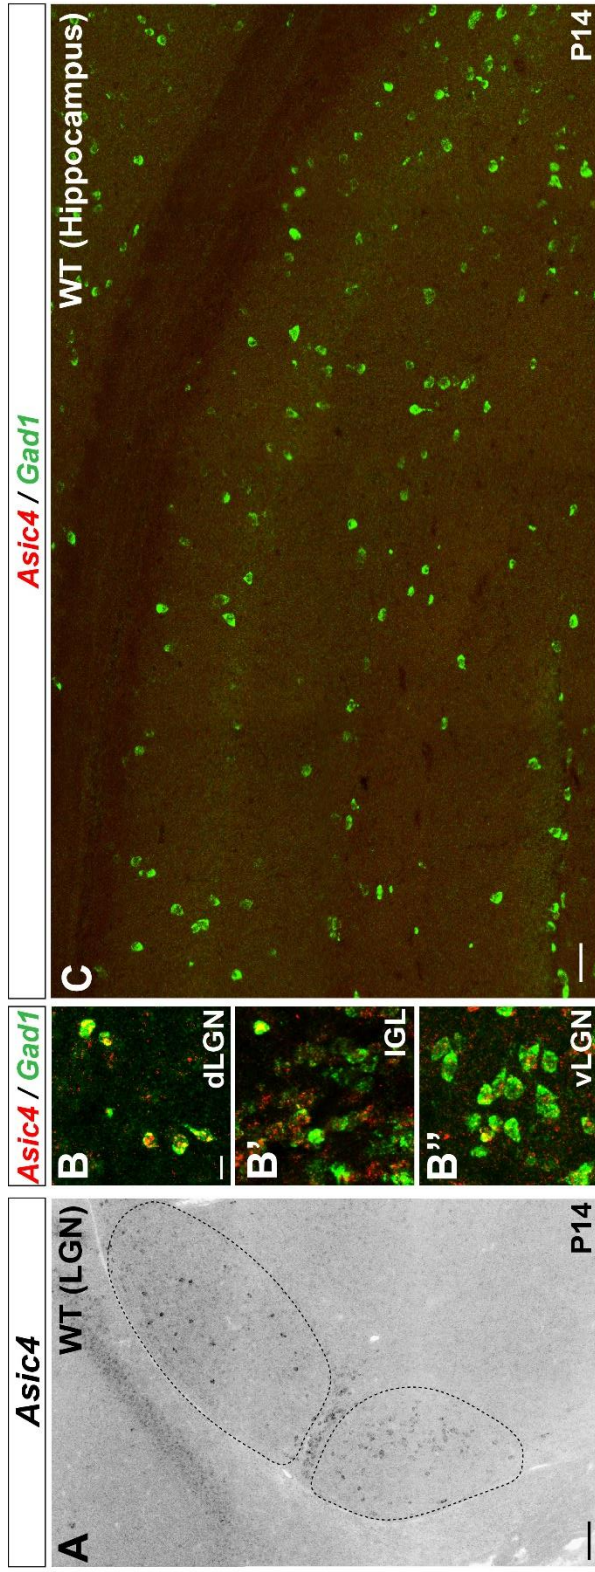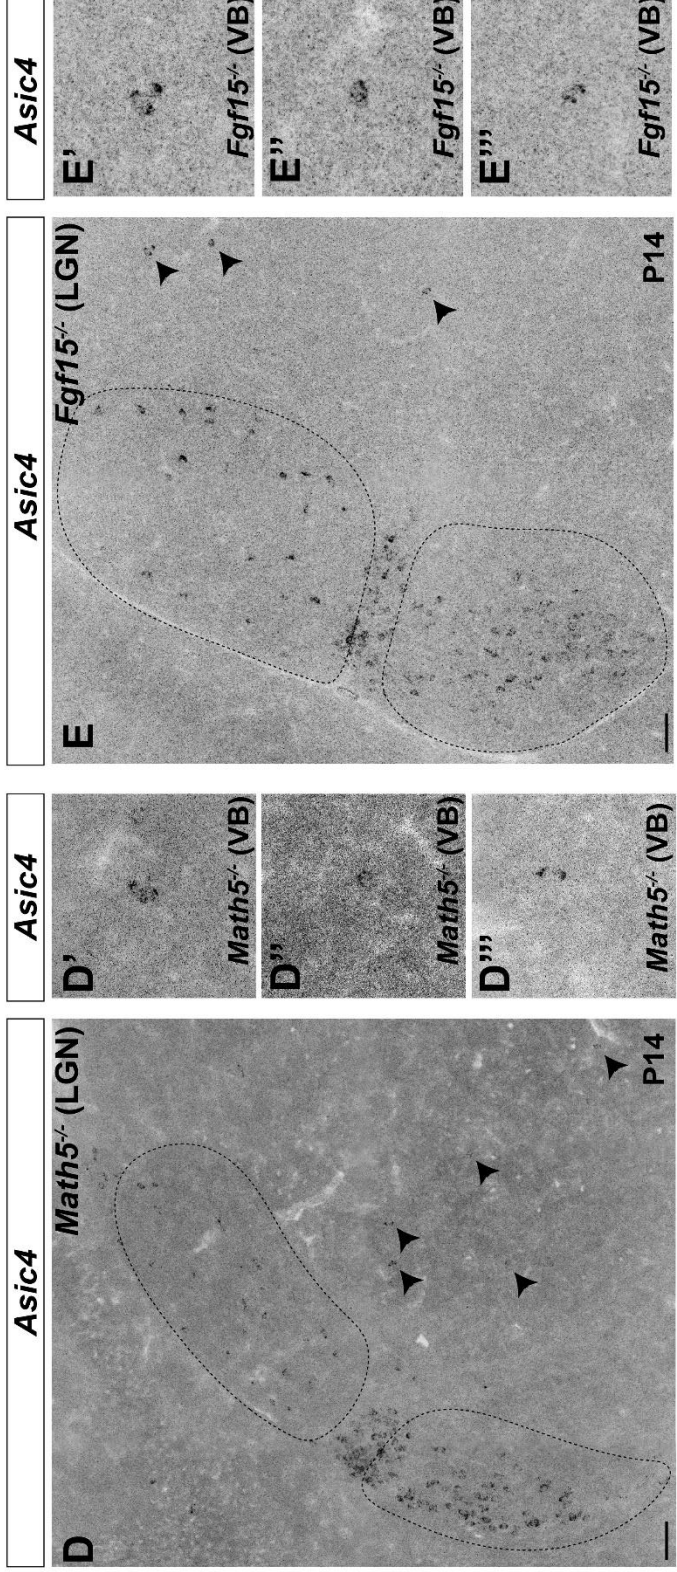

**Fig. S3. GABAergic interneurons in visual thalamus express *Asic4*.**

(A) *In situ* hybridization of *Asic4* mRNA in WT LGN. (B) Double *in situ* hybridization of *Asic4* mRNA and *Gad1* mRNA demonstrating that thalamic GABAergic interneurons express *Asic4*. (C) Double *in situ* hybridization of *Asic4* mRNA and *Gad1* mRNA demonstrating that hippocampal GABAergic neurons do not express *Asic4*. (D) *In situ* hybridization of *Asic4* mRNA in thalamus of *Math5*<sup>-/-</sup> mutants indicates the presence of *Asic4*<sup>+</sup> cells in inappropriate thalamic regions (D'-D'''). (E) *In situ* hybridization of *Asic4* mRNA in thalamus of *Fgf15*<sup>-/-</sup> mutants indicates the presence of *Asic4*<sup>+</sup> cells in inappropriate thalamic regions (E'-E'''). Scale bars = 70 μm for A,C,D,E; 20 μm for B,D',E'.

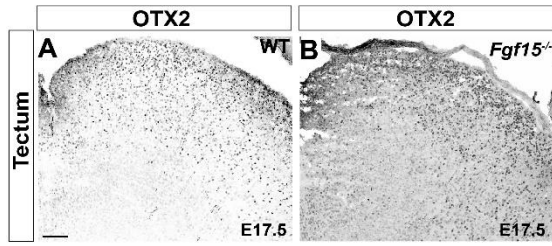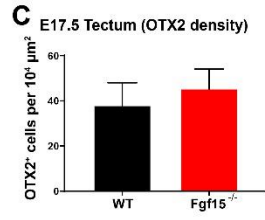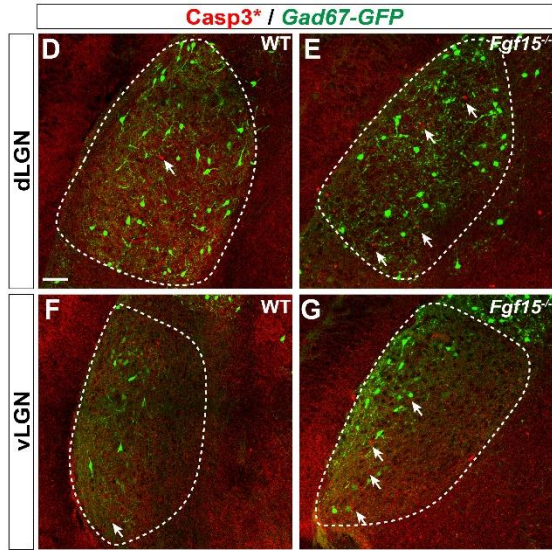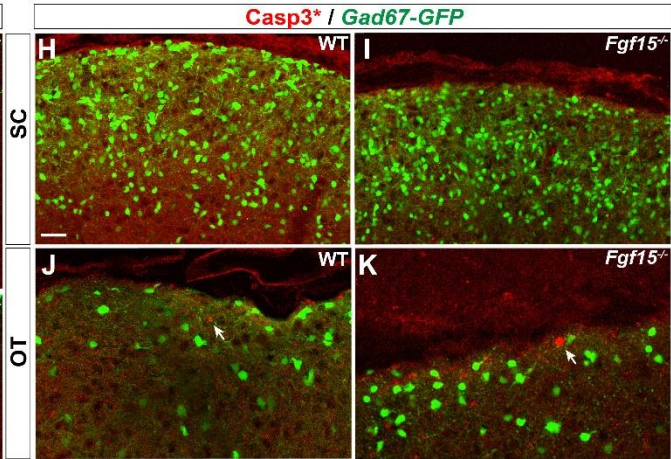



**Fig S4. Loss of FGF15 does not impair the generation of OTX2<sup>+</sup> cells or increase programmed cell death.**

(A,B) Immunostaining for OTX2 in embryonic tectum of WT and *Fgf15*<sup>-/-</sup> mice. (C) Quantification of expression of OTX2<sup>+</sup> cells in the embryonic tectum of WT and *Fgf15*<sup>-/-</sup> mice. Data are shown as means ± SEM. (D-G) Immunostaining for cleaved Caspase 3 in LGN of *Gad67-GFP* and *Gad67-GFP::Fgf15*<sup>-/-</sup> mice. (H-I) Immunostaining for cleaved Caspase 3 in tectum of *Gad67-GFP* and *Gad67-GFP::Fgf15*<sup>-/-</sup> mice. (H-I) Immunostaining for cleaved Caspase 3 in tectum of *Gad67-GFP* and *Gad67-GFP::Fgf15*<sup>-/-</sup> mice. (J-K) Immunostaining for cleaved Caspase 3 in optic tract of *Gad67-GFP* and *Gad67-GFP::Fgf15*<sup>-/-</sup> mice. Scale bars = 150 μm for A,B; 70 μm for D-K.

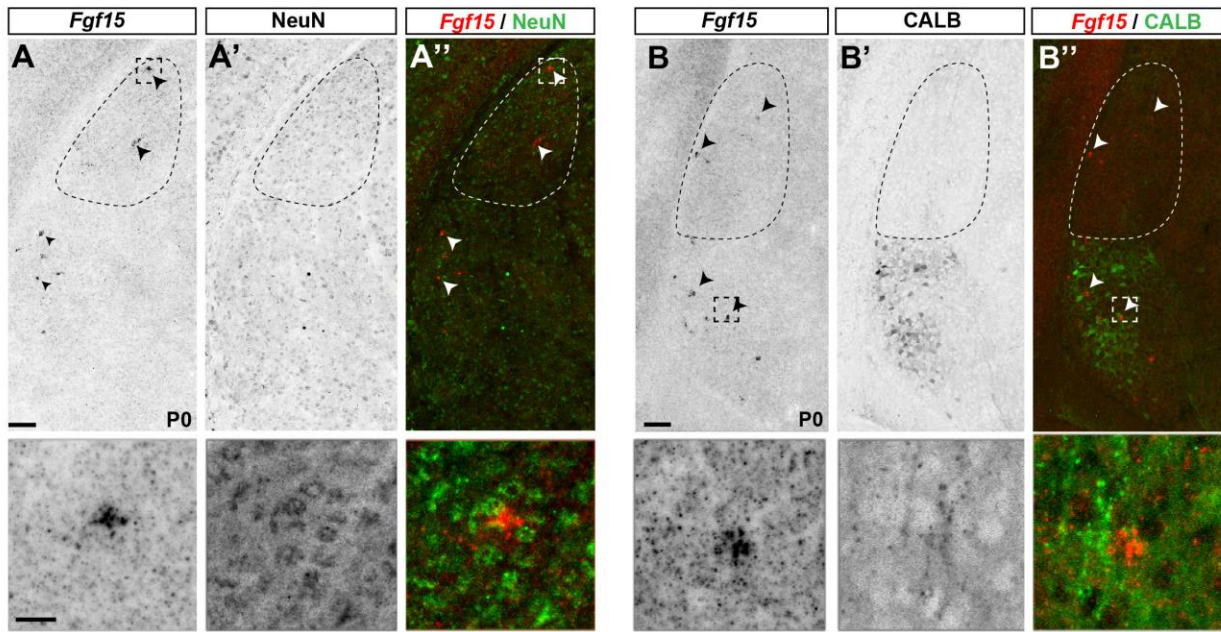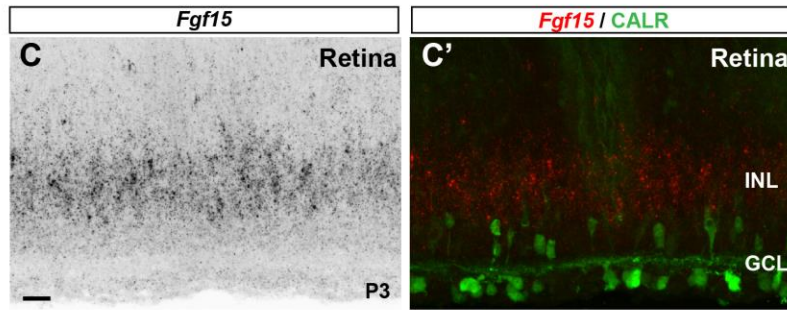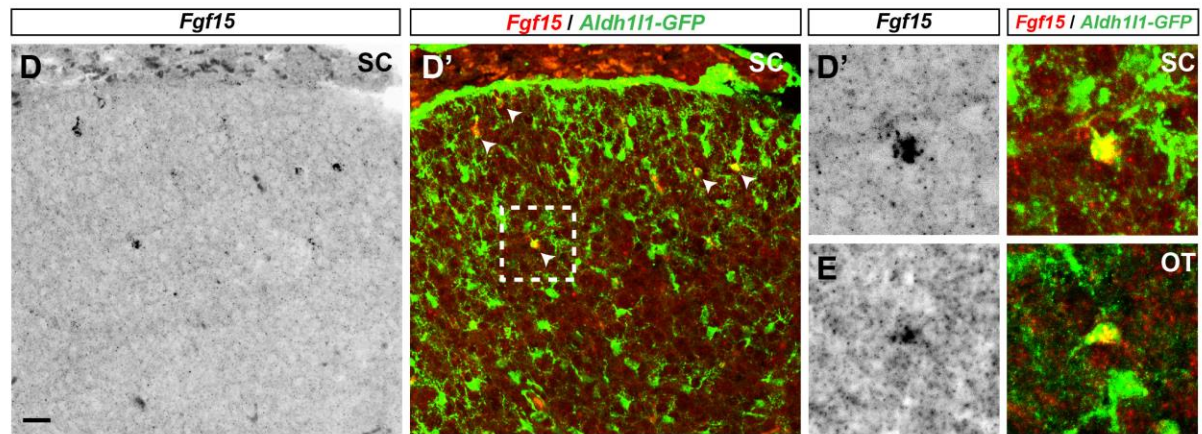

**Fig S5. *Fgf15* is generated by astrocytes and not thalamic neurons or RGCs during neonatal development.**

(A) *In situ* hybridization for *Fgf15* and immunostaining for NeuN in P0 visual thalamus (dLGN outlined with dashed lines). White arrowheads indicate *Fgf15*<sup>+</sup>NeuN<sup>-</sup> cells. (B) *In situ* hybridization for *Fgf15* and immunostaining for CALB in P0 visual thalamus (dLGN outlined with dashed lines). White arrowheads indicate *Fgf15*<sup>+</sup>NeuN<sup>-</sup> cells. White arrowheads indicate *Fgf15*<sup>+</sup>CALB<sup>-</sup> cells. (C) *In situ* hybridization for *Fgf15* and immunostaining for CALR in P3 retina. (D) *In situ* hybridization for *Fgf15* in superior colliculus of *Aldh111-GFP* mice demonstrating astrocytic expression of *Fgf15*. (E) *In situ* hybridization for *Fgf15* in optic tract of *Aldh111-GFP* mice demonstrating astrocytic expression of *Fgf15*. Scale bars: 60 μm for A,B; insets 20 μm. 30 μm for C,D.

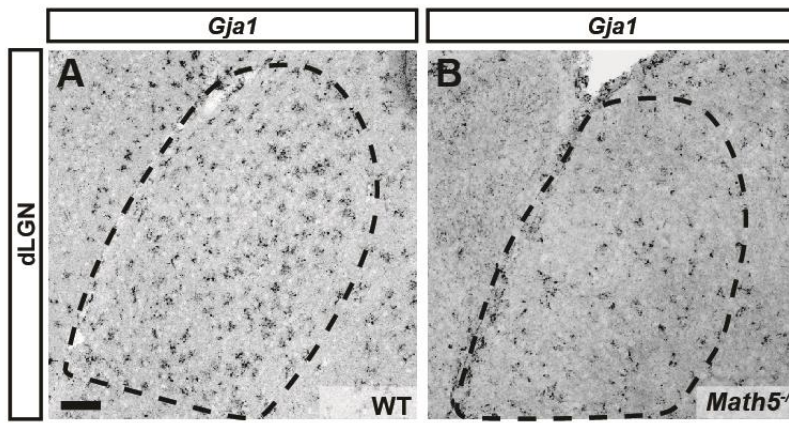

**C** dLGN (*Gja1* density)

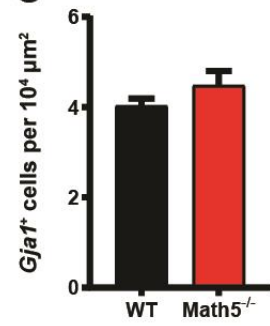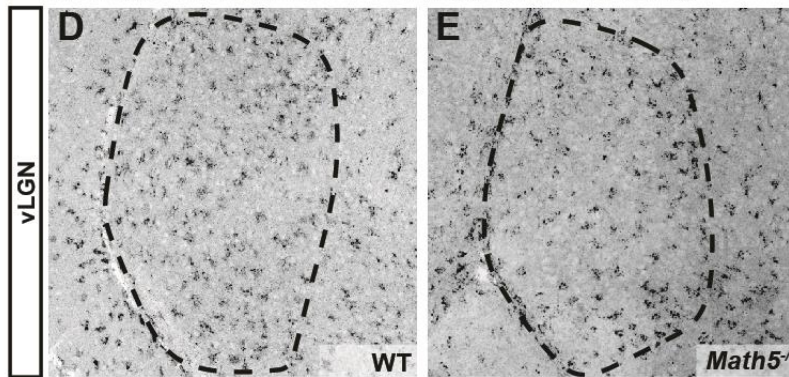

**F** vLGN (*Gja1* density)

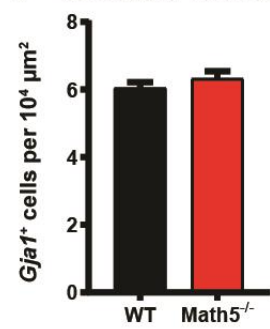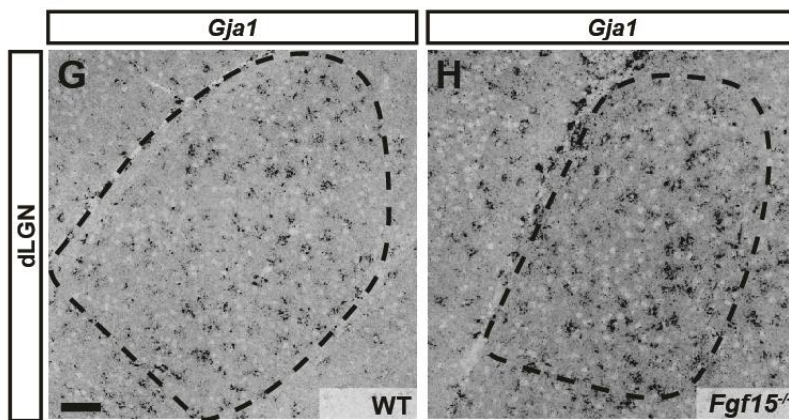

**I** dLGN (*Gja1* density)

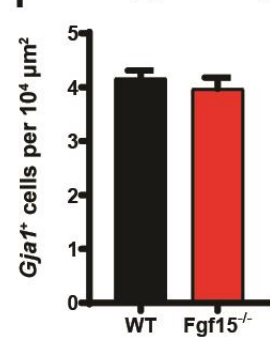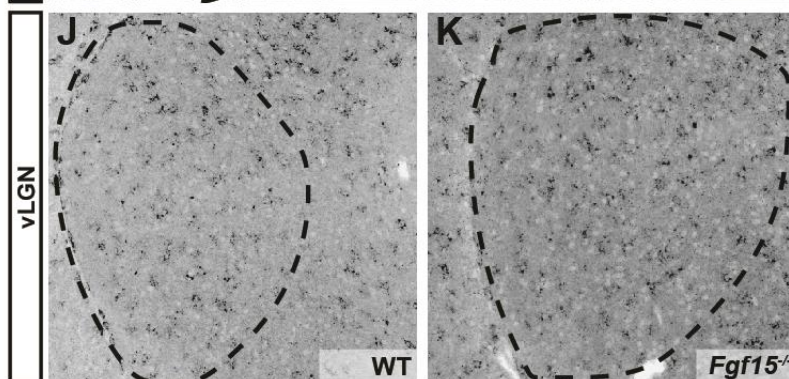

**L** vLGN (*Gja1* density)

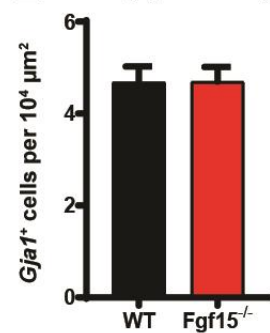

**Fig S6. Loss of retinal input or *Fgf15* does not impact the distribution of *Gja1*<sup>+</sup> astrocytes in visual thalamus.**

(A,B) In situ hybridization for *Gja1*, a marker of astrocytes, in WT (A) and *Math5*<sup>-/-</sup> (B) dLGN (outlined with dashed lines). (C) Quantification of *Gja1*-expressing cells in dLGN of WT and *Math5*<sup>-/-</sup> mice. Data are shown as means  $\pm$  SEM. (D,E) In situ hybridization for *Gja1*, a marker of astrocytes, in WT (D) and *Math5*<sup>-/-</sup> (E) vLGN (outlined with dashed lines). (F) Quantification of *Gja1*-expressing cells in vLGN of WT and *Math5*<sup>-/-</sup> mice. Data are shown as means  $\pm$  SEM. (G,H) In situ hybridization for *Gja1*, a marker of astrocytes, in WT (G) and *Fgf15*<sup>-/-</sup> (H) dLGN (outlined with dashed lines). (I) Quantification of *Gja1*-expressing cells in dLGN of WT and *Fgf15*<sup>-/-</sup> mice. Data are shown as means  $\pm$  SEM. (J,K) In situ hybridization for *Gja1*, a marker of astrocytes, in WT (J) and *Fgf15*<sup>-/-</sup> (K) vLGN (outlined with dashed lines). (L) Quantification of *Gja1*-expressing cells in vLGN of WT and *Fgf15*<sup>-/-</sup> mice.

Scale bar = 50  $\mu$ m for A-E; 70  $\mu$ m for G-K.
